# Supplementary material for: Comparability of the Effectiveness of Different Types of Exercise in the Treatment of Achilles Tendinopathy: A Systematic Review
Source: MDPI journal article supplement (doi:10.3390/healthcare11162268), 2023-08-11
Supplement: s1 [file s1]

**Table S1. Database search strategy**

|                                                                                                                                                                                                                                                                                                                                                                                                                                             |
|---------------------------------------------------------------------------------------------------------------------------------------------------------------------------------------------------------------------------------------------------------------------------------------------------------------------------------------------------------------------------------------------------------------------------------------------|
| <b>PubMed and Scopus</b>                                                                                                                                                                                                                                                                                                                                                                                                                    |
| ((("Tendinopathy"[Mesh]) OR "Achilles Tendon"[Mesh] OR "achilles tendinopathy" [tw] OR "achilles tendinitis" [tw] OR "achilles tendon injur*" [tw])) AND ("exercise Therapy"[Mesh] OR "Exercise"[Mesh] OR "Pilates"[Mesh] OR "Clinical Pilates"[Mesh] OR exercis*[tw] OR load*[tw] OR rehab* [tw])) AND ("Treatment Outcome"[Mesh] OR effectiv* [tw]) Filters: Clinical Trial, Randomized Controlled Trial                                  |
| <b>Science Direct</b>                                                                                                                                                                                                                                                                                                                                                                                                                       |
| <ul style="list-style-type: none"> <li>• (tendinopathy OR "Achilles Tendon" OR "achilles tendinopathy") AND ("exercise Therapy" OR Exercise OR exercising OR pilates OR "clinical pilates") AND ("Treatment Outcome" OR effective)</li> <li>• ("achilles tendinitis" OR "achilles tendon injury") AND (load OR loading OR rehabilitation) AND (effectiveness)</li> </ul>                                                                    |
| <b>Pedro</b>                                                                                                                                                                                                                                                                                                                                                                                                                                |
| <ul style="list-style-type: none"> <li>• Achilles tend* exercis* "treatment outcome"</li> <li>• Achilles tend* exercis* effectiv*</li> <li>• Achilles tend* pilates "treatment outcome"</li> <li>• Achilles tend* pilateseffectiv*</li> <li>• Achilles tend* load* "treatment outcome"</li> <li>• Achilles tend* load* effectiv*</li> <li>• Achilles tend* rehab* "treatment outcome"</li> <li>• Achilles tend* rehab* effectiv*</li> </ul> |

**Table S2. Criteria Furlan, et al. (2009) to assess risk of bias in randomized controlled trials**

|                                                                               |                    |
|-------------------------------------------------------------------------------|--------------------|
| A. 1. Was the method of randomization adequate?                               | Yes / No / Unclear |
| B. 2. Was the treatment intervention allocation concealed?                    | Yes / No / Unclear |
| C. Was treatment concealment maintained during delivery of the interventions? | Yes / No / Unclear |
| 3. Was there blinding of the therapist during delivery of the intervention?   | Yes / No / Unclear |
| 4. Was the patient blinded during the delivery of the intervention?           | Yes / No / Unclear |
| 5. Was the outcome assessor blinded to the intervention?                      | Yes / No / Unclear |
| D. Are missing outcome data adequately accounted for?                         | Yes / No / Unclear |
| 6. Is the dropout rate described and acceptable?                              | Yes / No / Unclear |
| 7. Were all participants analyzed in the group to                             | Yes / No / Unclear |

|                                                                                     |                    |
|-------------------------------------------------------------------------------------|--------------------|
| which they were allocated?                                                          |                    |
| 8. Is the study report free of selective information about the results?             | Yes / No / Unclear |
| E. Other sources of potential bias                                                  | Yes / No / Unclear |
| 9. Were the groups similar at baseline on the most important prognostic indicators? | Yes / No / Unclear |
| 10. Were escorts or similar interventions avoided?                                  | Yes / No / Unclear |
| 11. Was compliance acceptable for all groups?                                       | Yes / No / Unclear |
| 12. Was the timing of outcome assessment similar for all groups?                    | Yes / No / Unclear |

Source: Furlan, et al ., (2009)

**Table S3. Level of research evidence rating scale**

|                                |                                                                                                                                          |
|--------------------------------|------------------------------------------------------------------------------------------------------------------------------------------|
| Strong research evidence       | Consistent positive (significant) findings from two or more high-quality randomized controlled trials                                    |
| Moderate research evidence     | Consistent positive (significant) findings from multiple low-quality studies and/or clinical trials or one high-quality randomized trial |
| Limited research evidence      | Positive (significant) findings from a low-quality randomized controlled trial or clinical trial                                         |
| Conflicting research evidence  | Conflicting (significant) findings between multiple studies (<75% of studies report consistent findings)                                 |
| No research evidence was found | Randomized controlled studies available, but no (significant) differences between intervention and control groups                        |
| No research evidence           | No randomized controlled trials were found                                                                                               |

Source : Van Tulder, et al (2003)

**Table S4. Characteristics of interventions in the intervention group**

| <b>Study</b>                   | <b>Type of exercise</b>                                                         | <b>Duration of intervention</b> | <b>Execution of exercises / week</b> | <b>Implementation/ day</b> |
|--------------------------------|---------------------------------------------------------------------------------|---------------------------------|--------------------------------------|----------------------------|
| Habets et al., 2021            | Eccentric Exercise (Alfredson Protocol)                                         | 12 weeks                        | 7                                    | 2                          |
|                                | Concentric – Eccentric Exercise (Silbernagel Protocol)                          |                                 |                                      | 1                          |
| Beyer et al., 2015             | Eccentric exercise                                                              | 12 weeks                        | 7                                    | 2                          |
|                                | High resistance exercises performed at a slow pace                              |                                 | 3                                    | -                          |
| Yu et al., 2012                | Eccentric strengthening (Combination of Curvin&Stanish and Alfredson protocols) | 8 weeks                         | 7                                    | 2                          |
|                                | Concentric Strengthening ( Mafi Protocol and Stretching)                        |                                 |                                      | 1                          |
| Mafi et al., 2001              | Eccentric exercise                                                              | 12 weeks                        | 7                                    | 2                          |
|                                | Concentric exercise                                                             |                                 |                                      |                            |
| Niessen-Vertommen et al., 1992 | Eccentric exercise ( Curvin&Stanish protocol )                                  | 12 weeks                        | 6                                    | 1                          |
|                                | Concentric exercise                                                             |                                 |                                      |                            |

**Table S5. Results and statistical comparisons for outcome measures in the intervention group of studies in the systematic review**

| Study                   | Outcome Measure     | Baseline M.V (S.D) | Completion of intervention M.V (S.D) | 1st period – M.V (S.D) | 2nd period – M.V (S.D) | p-value baseline - finish | p - value baseline-1st FOLLOW-UP | p - value baseline-2nd FOLLOW-UP |
|-------------------------|---------------------|--------------------|--------------------------------------|------------------------|------------------------|---------------------------|----------------------------------|----------------------------------|
| Habets et al., 2021     | VISA-A              | 60.7 ± 17.1        | -                                    | -                      | 89.4 ± 13.0            | -                         | -                                | P < 0.001                        |
|                         | VAS-ADL             | 28.6 ± 22.1        | -                                    | -                      | 5.8 ± 8.3              | -                         | -                                | P = 0.004                        |
|                         | VAS – sports        | 44.8 ± 26.8        | -                                    | -                      | 13.1 ± 20.2            | -                         | -                                | P = 0.027                        |
|                         | EQ-5D               | 82.6 ± 8.7         | -                                    | -                      | 81.0 ± 20.3            | -                         | -                                | -                                |
| Beyer et al., 2015      | VISA-A              | 58 ± 3.9           | 72 ± 3.7                             | 84 ± 3.5               | -                      | P < 0.0001                | P < 0.0001                       | -                                |
|                         | VAS (heel)          | 19 ± 5.0           | 12 ± 3.6                             | 6 ± 2.6                | -                      | P < 0.0001                | P < 0.0001                       | -                                |
|                         | VAS (running)       | 49 ± 5.5           | 20 ± 5.7                             | 12 ± 4.2               | -                      | P < 0.0001                | P < 0.0001                       | -                                |
|                         | A-P, mm             | 8.3 ± 0.3          | 8.1 ± 0.4                            | 7.3 ±0.3               | -                      | P < 0.0001                | P < 0.0001                       | -                                |
|                         | Doppler, %          | 2.8 ± 0.6          | 2.8 ± 0.5                            | 1.6 ± 0.5              | -                      | P < 0.005                 | P < 0.005                        | -                                |
| Yu et al., 2012         | VAS                 | 5.72 ± 0.89        | 2.16 ± 0.42                          | -                      | -                      | P < 0.05                  | -                                | -                                |
|                         | PTKE, Nm            | 174.78 ± 9.32      | 212.26 ±0.02                         | -                      | -                      | P < 0.05                  | -                                | -                                |
|                         | PTKF, Nm            | 118.43 ± 9.88      | 128.92 ± 5.07                        | -                      | -                      | P < 0.05                  | -                                | -                                |
|                         | PTAP, Nm            | 56.91 ±7.26        | 66.38± 11.80                         | -                      | -                      | P < 0.05                  | -                                | -                                |
|                         | PTAD, Nm            | 36.97 ± 6.89       | 44.66 ± 10.18                        | -                      | -                      | P < 0.05                  | -                                | -                                |
|                         | BAG, Nm             | 127.01 ± 4.71      | 131.41 ±2.16                         | -                      | -                      | P < 0.05                  | -                                | -                                |
|                         | EKF, Nm             | 94.16 ± 15.41      | 98.07 ± 13.44                        | -                      | -                      | P < 0.05                  | -                                | -                                |
|                         | EAP, Nm             | 48.92 ± 4.42       | 62.48 ± 9.48                         | -                      | -                      | P < 0.05                  | -                                | -                                |
|                         | EAD, Nm             | 24.75 ± 5.37       | 41.98 ±3.68                          | -                      | -                      | P < 0.05                  | -                                | -                                |
|                         | Total balance index | 36.38± 8.51        | 8.00 ± 5.39                          | -                      | -                      | P < 0.05                  | -                                | -                                |
|                         | AP balance index    | 37.88 ± 4.38       | 7.38 ± 7.21                          | -                      | -                      | P < 0.05                  | -                                | -                                |
|                         | ML balance index    | 29.38± 4.34        | 8.25 ± 7.00                          | -                      | -                      | P < 0.05                  | -                                | -                                |
|                         | Dexterity           | 27.75 ± 5.57       | 51.63 ± 6.78                         | -                      | -                      | P < 0.05                  | -                                | -                                |
| Agility                 | 53.13 ± 4.32        | 68.00 ± 3.46       | -                                    | -                      | P < 0.05               | -                         | -                                |                                  |
| Mafi et al ., 2001      | VAS                 | 69                 | 12                                   | -                      | -                      | -                         | -                                | -                                |
| Niessen-Vertommen et al | Pain                | 6.0                | 1.3                                  | -                      | -                      | P < 0.01                  | -                                | -                                |

Abbreviations: MV, Mean Value; S.D., Standard Deviation; FU, Long-term follow-up; VISA-A, Victorian Institute of Sports Assessment–Achilles; VAS, visual analog scale; ADL, activities of daily living; AP, anterior-posterior, PTKE, peak torque of knee extension; PTKF, peak torque of knee flexion; PTAP, peak torque of ankle plantar flexion; PTAD, peak torque of ankle, dorsiflexion; EKE, endurance of knee extension; EKF, endurance of knee flexion; EAP, endurance of ankle plantar flexion; EAD, endurance of ankle dorsiflexion.

**Table S6. Results and statistical comparisons for outcome measures in the control group of systematic review studies**

| Study                   | Outcome Measure     | Baseline M.V (S.D) | Completion of intervention M.V (S.D) | 1st period – Follow-up M.V (S.D) | 2nd period – Follow-up M.V (S.D) | p-value start-finish | p - value start - 1 <sup>st</sup> MP | p - value start- 2 <sup>nd</sup> MP |
|-------------------------|---------------------|--------------------|--------------------------------------|----------------------------------|----------------------------------|----------------------|--------------------------------------|-------------------------------------|
| Habets et al., 2021     | VISA-A              | 59.8 ± 22.2        | -                                    | -                                | 83.2 ± 22.4                      | -                    | -                                    | P < 0.001                           |
|                         | VAS-ADL             | 28.6 ± 31.8        | -                                    | -                                | 9.0 ± 23.0                       | -                    | -                                    | P = 0.004                           |
|                         | VAS – sports        | 46.6 ± 32.6        | -                                    | -                                | 12.8 ± 24.6                      | -                    | -                                    | P = 0.027                           |
|                         | EQ-5D               | 77.2 ± 13.1        | -                                    | -                                | 77.9 ± 23.4                      | -                    | -                                    | -                                   |
| Beyer et al., 2015      | VISA-A              | 54 ± 3.2           | 76 ± 3.7                             | 89 ± 2.8                         | -                                | P < 0.0001           | P < 0.0001                           | -                                   |
|                         | VAS (heel)          | 29 ± 5.5           | 7 ± 2.4                              | 5 ± 2.5                          | -                                | P < 0.0001           | P < 0.0001                           | -                                   |
|                         | VAS (running)       | 54 ± 5.4           | 17 ± 4.1                             | 5 ± 2.6                          | -                                | P < 0.0001           | P < 0.0001                           | -                                   |
|                         | A-P, mm             | 8.6 ± 0.5          | 7.9 ± 0.4                            | 6.9 ± 0.3                        | -                                | P < 0.0001           | P < 0.0001                           | -                                   |
|                         | Doppler, %          | 4.0 ± 0.8          | 2.0 ± 0.5                            | 1.0 ± 0.4                        | -                                | P < 0.005            | P < 0.005                            | -                                   |
| Yu et al., 2012         | VAS                 | 5.72 ± 0.79        | 3.26 ± 0.78                          | -                                | -                                | P < 0.05             | -                                    | -                                   |
|                         | PTKE, Nm            | 157.92 ± 35.86     | 188.27 ± 34.36                       | -                                | -                                | P < 0.05             | -                                    | -                                   |
|                         | PTKF, Nm            | 114.78 ± 24.75     | 122.47 ± 19.63                       | -                                | -                                | P < 0.05             | -                                    | -                                   |
|                         | PTAP, Nm            | 63.21 ± 6.33       | 71.18 ± 10.33                        | -                                | -                                | P < 0.05             | -                                    | -                                   |
|                         | PTAD, Nm            | 36.73 ± 11.73      | 43.85 ± 12.16                        | -                                | -                                | P < 0.05             | -                                    | -                                   |
|                         | BAG, Nm             | 119.23 ± 26.26     | 118.46 ± 13.83                       | -                                | -                                | P < 0.05             | -                                    | -                                   |
|                         | EKF, Nm             | 91.71 ± 12.50      | 92.32 ± 20.63                        | -                                | -                                | P < 0.05             | -                                    | -                                   |
|                         | EAP, Nm             | 52.91 ± 6.16       | 59.41 ± 8.36                         | -                                | -                                | P < 0.05             | -                                    | -                                   |
|                         | EAD, Nm             | 24.32 ± 4.24       | 33.02 ± 7.22                         | -                                | -                                | P < 0.05             | -                                    | -                                   |
|                         | Total balance index | 29.00 ± 16.02      | 22.50 ± 7.52                         | -                                | -                                | P < 0.05             | -                                    | -                                   |
|                         | AP balance index    | 40.38 ± 22.74      | 30.38 ± 21.24                        | -                                | -                                | P < 0.05             | -                                    | -                                   |
|                         | ML balance index    | 37.25 ± 11.38      | 25.00 ± 12.96                        | -                                | -                                | P < 0.05             | -                                    | -                                   |
| Mafi et al ., 2001      | Dexterity           | 28.75 ± 7.30       | 49.13 ± 5.41                         | -                                | -                                | P < 0.05             | -                                    | -                                   |
|                         | Agility             | 54.63 ± 4.65       | 64.38 ± 4.47                         | -                                | -                                | P < 0.05             | -                                    | -                                   |
| Niessen-Vertommen et al | VAS                 | 63                 | 9                                    | -                                | -                                | -                    | -                                    | -                                   |
|                         | Pain                | 6.5                | 3.5                                  | -                                | -                                | P < 0.01             | -                                    | -                                   |

Abbreviations: MV, Mean Value; S.D., Standard Deviation; FU, Long-term follow-up; VISA-A, Victorian Institute of Sports Assessment–Achilles; VAS, visual analog scale; ADL, activities of daily living; AP, anterior-posterior, PTKE, peak torque of knee extension; PTKF, peak torque of knee flexion; PTAP, peak torque of ankle plantar flexion; PTAD, peak torque of ankle, dorsiflexion; EKE, endurance of knee extension; EKF, endurance of knee flexion; EAP, endurance of ankle plantar flexion; EAD, endurance of ankle dorsiflexion.

**Table S7. Comparison of outcome measures for the intervention and control groups of the Habets study et al ., (2021)**

| Measuring tool                                                                                                                                                                                                            | Baseline– Finish D [CI] | Baseline - 1st period D [CI] | Baseline – 2nd period D [CI] | p-value Baseline – Finish | p - value Baseline – 1st period | p - value Baseline – 2nd period |
|---------------------------------------------------------------------------------------------------------------------------------------------------------------------------------------------------------------------------|-------------------------|------------------------------|------------------------------|---------------------------|---------------------------------|---------------------------------|
| VISA-A                                                                                                                                                                                                                    | 0.9 [ -11.9 ,13.8 ]     | 1.1 [-11.8, 14.0 ]           | 4.3 [ -8.0 ,16.6 ]           | p = 0.885                 | p = 0 .867                      | p = 0.479                       |
| VAS-ADL                                                                                                                                                                                                                   | -0.9 [ -12.4 ,10.6 ]    | 4.5 [-8.1, 17.0]             | -0.1 [-10.3, 10.1]           | p =0.874                  | p =0.475                        | p =0.986                        |
| VAS – sports                                                                                                                                                                                                              | -0.7 [-18.3, 16.9]      | -1.0 [-17.6, 15.7]           | 2.9 [-12.3, 18.1]            | p = 0.936                 | p = 0.908                       | p = 0.702                       |
| EQ-5D                                                                                                                                                                                                                     | -                       | -                            | -                            | -                         | -                               | -                               |
| Abbreviations: D, mean difference between the two groups at this time point; CI, Confidence Interval,VISA-A, Victorian Institute of Sports Assessment–Achilles; VAS, visual analog scale; ADL, activities of daily living |                         |                              |                              |                           |                                 |                                 |

**Table S8. Comparison of outcome measures for the intervention and control groups in the Beyer et al., (2015) and Yu et al., (2012) studies**

| Study              | Outcome Measure     | Baseline – Finish         |                            | Baseline– 1st period       |                            | p-value Baseline– Finish  | p - value Baseline– 1st period |
|--------------------|---------------------|---------------------------|----------------------------|----------------------------|----------------------------|---------------------------|--------------------------------|
|                    |                     | EG D [CI]                 | CG D [CI]                  | EG D [CI]                  | CG D [CI]                  | -                         | -                              |
| Beyer et al., 2015 | VISA-A              | -14 ± 2.5 [ -18.8, -8.8 ] | -22 ± 2.7 [ -26.9, -16.4 ] | -27 ± 4.5 [ -35.6, -18.0 ] | -34 ± 3.9 [ -41.8, -26.5 ] | -                         | p = 0.62                       |
|                    | VAS (heel)          | 7 ± 3.9 [ -0.8, 14.5]     | 22 ± 5.5 [10.8, 32.3]      | 13 ± 5.9 [1.3, 24.3]       | 24 ± 5.7 [12.7, 35.0]      | -                         | p = 0.77                       |
|                    | VAS (running)       | 29 ± 5.1 [18.9, 38.8]     | 37 ± 6.7 [23.4, 49.8]      | 38 ± 6.2 [25.6, 49.9]      | 49 ± 7.0 [35.5, 62.8]      | -                         | p = 0.71                       |
|                    | A-P, mm             | 0 ± 0.1 [0, 0.5]          | 0.6 ± 0.2 [0.2, 0.9]       | 1.0 ± 0.3 [0.5, 1.5]       | 1.7 ± 0.3 [ 1.1, 2.4 ]     | -                         | -                              |
|                    | Doppler, %          | 0 ± 0.4 [ -0.9, 0.8 ]     | 2.3 ± 0.8 [ 0.8, 3.7 ]     | 4.0 ± 0.9 [ 2.7, 6.1 ]     | 1.1 ± 0.4 [ 0.2, 1.9 ]     | -                         | -                              |
| Yu et al., 2012    | YOU GO              | -3.56 ± 0.60              | -2.46 ± 0.66               | -                          | -                          | -                         | -                              |
|                    | PTKE, Nm            | 37.47 ± 20.13             | 30.35 ± 36.43              | -                          | -                          | p =0.636                  | -                              |
|                    | PTKF, Nm            | 10.48 ± 13.10             | 7.68 ± 18.83               | -                          | -                          | p =0.735                  | -                              |
|                    | PTAP, Nm            | 9.47 ± 11.04              | 7.97 ± 10.94               | -                          | -                          | p =0.789                  | -                              |
|                    | PTAD, Nm            | 7.68 ± 6.47               | 7.11 ± 12.79               | -                          | -                          | p =0.911                  | -                              |
|                    | BAG, Nm             | 4.40 ± 20.13              | -0.77 ± 28.28              | -                          | -                          | p =0.680                  | -                              |
|                    | EKF, Nm             | 3.91 ± 18.40              | 0.61 ± 30.08               | -                          | -                          | p =0.795                  | -                              |
|                    | EAP, Nm             | 13.56 ± 9.44              | 6.50 ± 10.46               | -                          | -                          | p =0.178                  | -                              |
|                    | EAD, Nm             | 17.23 ± 5.47              | 8.70 ± 8.01a               | -                          | -                          | p =0.026                  | -                              |
|                    | Total balance index | -28.38 ± 6.73             | -6.50 ± 11.61              | -                          | -                          | X <sup>2</sup> /P = 0.000 | -                              |
|                    | AP balance index    | -30.50 ± 16.26            | -10.00 ± 23.54             | -                          | -                          | X <sup>2</sup> /P = 0.062 | -                              |
|                    | ML balance index    | -21.13 ± 10.93            | -12.25 ± 9.13              | -                          | -                          | X <sup>2</sup> /P = 0.100 | -                              |
|                    | Dexterity           | 23.88 ± 2.35              | 20.38 ± 4.43               | -                          | -                          | X <sup>2</sup> /P =0.058  | -                              |
|                    | Agility             | 14.88 ± 2.69              | 9.75 ± 2.31                | -                          | -                          | X <sup>2</sup> /P = 0.001 | -                              |

Abbreviations: E.G, Experimental Group; C.G, Control Group, VISA-A, Victorian Institute of Sports Assessment–Achilles; VAS, visual analog scale; AP, anterior-posterior, PTKE, peak torque of knee extension; PTKF, peak torque of knee flexion; PTAP, peak torque of ankle plantar flexion; PTAD, peak torque of ankle, dorsiflexion; EKE, endurance of knee extension; EKF, endurance of knee flexion; EAP, endurance of ankle plantar flexion; EAD, endurance of ankle dorsiflexion.
